# Supplementary material for: MRI predictors of amyloid pathology: results from the EMIF-AD Multimodal Biomarker Discovery study
Source: PubMed Central journal article supplement (PMC6161396; doi:10.1186/s13195-018-0428-1), 2018-09-27
Supplement: 13195_2018_428_MOESM1_ESM.pdf [file 13195_2018_428_MOESM1_ESM.pdf]

## **MRI predictors of amyloid pathology: results from the EMIF-AD multimodal biomarker discovery study**

M. ten Kate, A. Redolfi, E. Peira, I. Bos, S.J. Vos, R. Vandenberghe, S. Gabel, J. Schaefferbeke, P. Scheltens, O. Blin, J.C. Richardson, R. Bordet, A. Wallin, C. Eckerstrom, J.L. Molinuevo, S. Engelborghs, C. Van Broeckhoven, P. Martinez-Lage, J. Popp, M. Tsolaki, F. Verhey, A.L. Baird, C. Legido-Quigley, L. Bertram, V. Dobricic, H. Zetterberg, S. Lovestone, J. Streffer, S. Bianchetti, G.P. Novak, J. Revillard, M.F. Gordon, Z. Xie, V. Wottschel, G. Frisoni, P.J. Visser, F. Barkhof

### **Supplementary Tables**

**Table S1: Priority neuropsychological test per domain per cohort**

| Cohort     | Memory                 | Attention                                   | Executive functioning | Language                          | Visuoconstruction                                      |
|------------|------------------------|---------------------------------------------|-----------------------|-----------------------------------|--------------------------------------------------------|
| Amsterdam  | RAVLT                  | TMT-A                                       | TMT-B                 | Animal fluency                    | Copy of Rey complex figure                             |
| Antwerp    | RBANs, memory<br>WMS   | RBANs, concentration<br>WMS, working memory | TMT-B                 | RBANs, language<br>BNT-60         | RBANs, visuoconstruction<br>Copy of Rey complex figure |
| DESCRIPA   | RAVLT                  | TMT-A                                       | TMT-B                 | Animal fluency                    | Copy of Rey complex figure                             |
| EDAR       | CERAD word list        | TMT-A                                       | TMT-B                 | Animal fluency                    | Copy CERAD figures                                     |
| GAP        | FCSR                   | TMT-A                                       | TMT-B                 | BNT-60                            | Copy of Rey complex figure                             |
| Gothenburg | RAVLT                  | TMT-A                                       | TMT-B                 | Letter fluency                    | Copy of Rey complex figure                             |
| IDIBAPS    | FCSR                   | TMT-A                                       | TMT-B                 | Animal fluency                    | Copy of Rey complex figure                             |
| Lausanne   | RI-48 cued recall test | TMT-A                                       | TMT-B                 | Animal fluency                    | Copy CERAD figures                                     |
| Leuven     | RAVLT                  | TMT-A                                       | TMT-B                 | Animal fluency                    | -                                                      |
| Pharmacog  | RAVLT                  | TMT-A                                       | TMT-B                 | Category fluency, sum of<br>three | -                                                      |
| Sant Pau   | -                      | -                                           | -                     | -                                 | -                                                      |

BNT: Boston Naming Test; CERAD: Consortium to Establish a Registry for AD; FCSR: Free and Cued Selective Reminding Test; RAVLT: Rey Auditory Verbal Learning Test; RBANs = Repeatable Battery for the Assessment of Neuropsychological status; TMT-A: Trail Making Test, part A; TMT-B: Trail Making Test, part B; WMS: Wechsler Memory Scale.

**Table S2: Number of amyloid positive and negative subjects per diagnosis per cohort**

| Diagnosis      | Cognitively normal |          | Mild Cognitive Impairment |          | Alzheimer type dementia |          | Total    |          |
|----------------|--------------------|----------|---------------------------|----------|-------------------------|----------|----------|----------|
| Amyloid status | Negative           | Positive | Negative                  | Positive | Negative                | Positive | Negative | Positive |
| Amsterdam      | 15 (50)            | 15 (50)  | 41 (50)                   | 41 (50)  | 1 (2)                   | 59 (98)  | 57 (33)  | 115 (67) |
| Antwerp        | -                  | -        | 9 (18)                    | 41 (82)  | -                       | 7 (100)  | 9 (16)   | 48 (84)  |
| DESCRIPA       | 4 (67)             | 2 (33)   | 6 (75)                    | 2 (25)   | -                       | -        | 10 (71)  | 4 (29)   |
| EDAR           | 13 (93)            | 1 (7)    | 11 (44)                   | 14 (56)  | 3 (16)                  | 16 (84)  | 27 (47)  | 31 (53)  |
| GAP            | 26 (68)            | 12 (32)  | -                         | -        | -                       | -        | 26 (68)  | 12 (32)  |
| Gothenburg     | 27 (56)            | 21 (44)  | 26 (57)                   | 20 (43)  | -                       | -        | 53 (56)  | 41 (44)  |
| IDIBAPS        | 27 (68)            | 13 (32)  | -                         | 14 (100) | -                       | 14 (100) | 27 (40)  | 41 (60)  |
| Lausanne       | 7 (70)             | 3 (30)   | 11 (42)                   | 15 (58)  | -                       | -        | 18 (50)  | 18 (50)  |
| Leuven         | 153 (85)           | 26 (15)  | -                         | -        | -                       | -        | 153 (85) | 26 (15)  |
| Pharmacog      | -                  | -        | 56 (38)                   | 91 (62)  | -                       | -        | 56 (38)  | 91 (62)  |
| Sant Pau       | -                  | -        | -                         | -        | -                       | -        | -        | -        |
| Total          | 272 (75)           | 93 (25)  | 160 (40)                  | 238 (60) | 4 (4)                   | 96 (96)  | 436 (51) | 427 (49) |

Data are displayed as count (percentage). Numbers are based on subjects with a good quality T1-weighted MRI scan.

**Table S3: Available MRI sequences for each cohort and acquisition parameters for 3DT1.**

| Cohort           | Contributed sequences |       |           | Scanner, field strength | Acquisition parameters 3D T1 |         |         |         |     |                    |
|------------------|-----------------------|-------|-----------|-------------------------|------------------------------|---------|---------|---------|-----|--------------------|
|                  | 3DT1                  | FLAIR | T2* / SWI |                         | Plane                        | TR (ms) | TI (ms) | TE (ms) | FA  | Voxel size (mm)    |
| Amsterdam        | Yes                   | Yes   | Yes       | GE 3T                   | 3D sagittal                  | 7.8     | 3.0     | 450     | 12° | 0.98 x 0.98 x 1.00 |
| Antwerp          | Yes                   | Yes   | Yes       | Siemens 3T              | 3D transversal               | 1910    | 1100    | 3.37    | 15° | 1.00 x 1.00 x 1.00 |
| DESCRIPA site 1  | Only 2D               | Yes   | -         | Philips 1.5T            | -                            | -       | -       | -       | -   | -                  |
| DESCRIPA site 2  | Yes                   | Yes   | Yes       | Siemens 1T              | 3D coronal                   | 15      | 300     | 7       | 15° | 0.98 x 0.98 x 1.49 |
| EDAR site 1.1    | Yes                   | Yes   | Yes       | Siemens 1.5T            | 3D sagittal                  | 2700    | 950     | 5.17    | 8°  | 1.00 x 1.00 x 1.50 |
| EDAR site 1.2    | Yes                   | Yes   | Yes       | GE 3T                   | 3D sagittal                  | 7.8     | 3.0     | 450     | 12° | 0.94 x 0.94 x 1.00 |
| EDAR site 2      | Yes                   | Yes   | -         | Philips 1.5T            | 3D sagittal                  | 20      | -       | 3       | 30° | 1.00 x 1.00 x 2.00 |
| EDAR site 3      | Yes                   | Yes   | Yes       | Philips 3T              | 3D sagittal                  | 8.2     | -       | 3.8     | 8°  | 1.00 x 1.00 x 1.00 |
| GAP              | Yes                   | Yes   | -         | Siemens 3T              | 3D sagittal                  | 2300    | 900     | 2.86    | 9°  | 1.25 x 1.25 x 1.25 |
| Gothenburg       | Yes                   | Yes   | -         | Siemens 1.5T            | 3D coronal                   | 1610    | 820     | 2.38    | 15° | 0.49 x 0.49 x 1.00 |
| IDIBAPS          | Yes                   | Yes   | -         | Siemens 3T              | 3D sagittal                  | 2300    | 900     | 2.98    | 9°  | 1.00 x 1.00 x 1.00 |
| Lausanne         | Yes                   | Yes   | Yes       | Siemens 3T              | 3D sagittal                  | 2300    | 900     | 2.98    | 9°  | 1.00 x 1.00 x 1.00 |
| Leuven           | Yes                   | Yes   | -         | Philips 3T              | 3D coronal                   | 9.6     | -       | 4.6     | 8°  | 0.98 x 0.98 x 1.20 |
| Pharmacog site 1 | Yes                   | Yes   | Yes       | Siemens 3T              | 3D sagittal                  | 2300    | 900     | 2.83    | 9°  | 1.00 x 1.00 x 1.00 |
| Pharmacog site 2 | Yes                   | Yes   | Yes       | Siemens 3T              | 3D sagittal                  | 2300    | 900     | 2.98    | 9°  | 1.00 x 1.00 x 1.00 |
| Pharmacog site 3 | Yes                   | Yes   | Yes       | Siemens 3T              | 3D sagittal                  | 2300    | 900     | 2.98    | 9°  | 1.00 x 1.00 x 1.00 |
| Pharmacog site 4 | Yes                   | Yes   | Yes       | Philips 3T              | 3D sagittal                  | 2300    | 900     | 3.16    | 9°  | 1.00 x 1.00 x 1.00 |
| Pharmacog site 5 | Yes                   | Yes   | Yes       | Philips 3T              | 3D sagittal                  | 2300    | 900     | 3.16    | 9°  | 1.00 x 1.00 x 1.00 |
| Pharmacog site 6 | Yes                   | Yes   | Yes       | GE 3T                   | 3D sagittal                  | 2300    | 900     | 2.86    | 9°  | 1.00 x 1.00 x 1.00 |
| Pharmacog site 7 | Yes                   | Yes   | Yes       | Siemens 3T              | 3D sagittal                  | 2300    | 900     | 2.98    | 9°  | 1.00 x 1.00 x 1.00 |
| Pharmacog site 8 | Yes                   | Yes   | Yes       | Siemens 3T              | 3D sagittal                  | 2300    | 900     | 2.03    | 9°  | 1.00 x 1.00 x 1.00 |
| Sant Pau         | -                     | -     | -         | -                       | -                            | -       | -       | -       | -   | -                  |

FA: flip angle; TR: repetition time; TI: inversion time; TE: echo time

**Table S4: Comparison between subjects who were included and excluded based on time difference between amyloid assessment and MRI**

| Diagnosis               | Cognitively normal |            | Mild Cognitive Impairment |                         | Alzheimer type dementia |             |
|-------------------------|--------------------|------------|---------------------------|-------------------------|-------------------------|-------------|
|                         | Included           | Excluded   | Included                  | Excluded                | Included                | Excluded    |
| N, % within group       | 337 (92)           | 28 (8)     | 374 (94)                  | 23 (6)                  | 98 (98)                 | 2 (2)       |
| Age, yrs                | 66.5 ± 7.2         | 64.8 ± 6.9 | 69.1 ± 7.5                | 66.3 ± 9.1              | 67.0 ± 7.6              | 70.0 ± 19.8 |
| Male gender             | 167 (50)           | 9 (33)     | 178 (48)                  | 10 (44)                 | 51 (52)                 | 1 (50)      |
| Education, yrs          | 13.1 ± 3.6         | 14.2 ± 3.4 | 11.0 ± 3.8                | 11.7 ± 3.4              | 11.1 ± 3.3              | 9.5 ± 4.9   |
| MMSE                    | 28.9 ± 1.1         | 29.3 ± 0.8 | 26.4 ± 2.5                | 27.6 ± 2.2 <sup>A</sup> | 22.5 ± 4.0              | 25.5 ± 2.1  |
| <i>APOE</i> ε4 genotype | 142 (42)           | 9 (32)     | 187 (50)                  | 9 (39)                  | 68 (69)                 | 1 (50)      |

Data are presented as mean ± SD or count (%). <sup>A</sup> p < 0.05, <sup>B</sup> p < 0.01, <sup>C</sup> p < 0.001 different between included and excluded subjects within diagnostic group.

**Table S5: Comparison between subjects who were included and excluded based on time difference between cognitive assessment and MRI**

| Diagnosis               | Cognitively normal |                         | Mild cognitive impairment |            | Alzheimer type dementia |                         |
|-------------------------|--------------------|-------------------------|---------------------------|------------|-------------------------|-------------------------|
|                         | Included           | Excluded                | Included                  | Excluded   | Included                | Excluded                |
| N, % within group       | 320 (88)           | 44 (12)                 | 345 (87)                  | 52 (13)    | 97 (97)                 | 3 (3)                   |
| Age, yrs                | 66.6 ± 7.3         | 65.0 ± 7.1              | 69.2 ± 7.4                | 67.0 ± 9.0 | 67.3 ± 7.8              | 60.1 ± 8.9              |
| Male gender             | 160 (50)           | 16 (36)                 | 166 (48)                  | 22 (42)    | 48 (51)                 | 3 (100)                 |
| Education, yrs          | 13.1 ± 3.6         | 14.2 ± 3.4 <sup>A</sup> | 11.0 ± 3.9                | 11.1 ± 2.9 | 11.0 ± 3.4              | 12.8 ± 0.6 <sup>B</sup> |
| MMSE                    | 28.8 ± 1.1         | 29.3 ± 0.8 <sup>C</sup> | 26.4 ± 2.5                | 27.0 ± 2.7 | 22.5 ± 4.1              | 25.0 ± 2.6              |
| <i>APOE</i> ε4 genotype | 134 (42)           | 17 (39)                 | 176 (51)                  | 20 (38)    | 66 (68)                 | 3 (100)                 |

Data are presented as mean ± SD or count (%). <sup>A</sup> p < 0.05, <sup>B</sup> p < 0.01, <sup>C</sup> p < 0.001 different between included and excluded subjects within diagnostic group.

**Table S6: Cortical thickness measures according to diagnosis and amyloid status**

| Diagnosis                | Cognitively Normal |             | Mild Cognitive Impairment |                                | Alzheimer type dementia |             |
|--------------------------|--------------------|-------------|---------------------------|--------------------------------|-------------------------|-------------|
| Amyloid status           | Negative           | Positive    | Negative                  | Positive                       | Negative                | Positive    |
| L superior frontal       | 2.49 (0.03)        | 2.48 (0.03) | <b>2.47 (0.03)</b>        | <b>2.43 (0.03)<sup>A</sup></b> | 2.35 (0.10)             | 2.40 (0.03) |
| R superior frontal       | 2.48 (0.02)        | 2.48 (0.03) | 2.46 (0.02)               | 2.44 (0.03)                    | 2.38 (0.10)             | 2.40 (0.03) |
| L rostral middle frontal | 2.19 (0.03)        | 2.17 (0.03) | 2.16 (0.03)               | 2.13 (0.03)                    | 2.16 (0.10)             | 2.12 (0.03) |
| R rostral middle frontal | 2.16 (0.02)        | 2.17 (0.03) | 2.15 (0.03)               | 2.12 (0.03)                    | 2.10 (0.09)             | 2.12 (0.03) |
| L caudal middle frontal  | 2.33 (0.03)        | 2.32 (0.03) | <b>2.29 (0.03)</b>        | <b>2.24 (0.03)<sup>A</sup></b> | 2.27 (0.11)             | 2.21 (0.03) |
| R caudal middle frontal  | 2.34 (0.03)        | 2.31 (0.03) | <b>2.29 (0.03)</b>        | <b>2.24 (0.03)<sup>A</sup></b> | 2.20 (0.11)             | 2.20 (0.03) |
| L pars opercularis       | 2.38 (0.03)        | 2.39 (0.03) | 2.35 (0.03)               | 2.32 (0.03)                    | 2.24 (0.10)             | 2.33 (0.03) |
| R pars opercularis       | 2.39 (0.02)        | 2.38 (0.03) | 2.36 (0.02)               | 2.36 (0.02)                    | 2.24 (0.11)             | 2.35 (0.03) |
| L pars orbitalis         | 2.50 (0.04)        | 2.50 (0.04) | 2.46 (0.04)               | 2.44 (0.04)                    | 2.58 (0.15)             | 2.45 (0.04) |
| R pars orbitalis         | 2.51 (0.04)        | 2.49 (0.04) | 2.44 (0.04)               | 2.46 (0.04)                    | 2.24 (0.14)             | 2.41 (0.04) |
| L pars triangularis      | 2.24 (0.03)        | 2.22 (0.03) | <b>2.22 (0.03)</b>        | <b>2.18 (0.03)<sup>A</sup></b> | 2.20 (0.11)             | 2.19 (0.03) |
| R pars triangularis      | 2.24 (0.03)        | 2.26 (0.03) | 2.22 (0.03)               | 2.20 (0.03)                    | 2.04 (0.10)             | 2.19 (0.03) |
| L lateral orbitofrontal  | 2.51 (0.02)        | 2.49 (0.03) | 2.47 (0.02)               | 2.47 (0.02)                    | 2.48 (0.11)             | 2.45 (0.03) |
| R lateral orbitofrontal  | 2.49 (0.04)        | 2.49 (0.04) | 2.46 (0.04)               | 2.46 (0.04)                    | 2.41 (0.11)             | 2.47 (0.04) |
| L medial orbitofrontal   | 2.33 (0.03)        | 2.32 (0.03) | 2.32 (0.03)               | 2.32 (0.03)                    | 2.22 (0.11)             | 2.30 (0.03) |
| R medial orbitofrontal   | 2.28 (0.03)        | 2.27 (0.03) | 2.28 (0.03)               | 2.29 (0.03)                    | 2.26 (0.13)             | 2.29 (0.03) |
| L precentral             | 2.27 (0.05)        | 2.28 (0.06) | 2.26 (0.05)               | 2.23 (0.05)                    | 2.19 (0.12)             | 2.21 (0.06) |
| R precentral             | 2.26 (0.04)        | 2.26 (0.05) | 2.25 (0.04)               | 2.22 (0.05)                    | 2.08 (0.11)             | 2.21 (0.05) |
| L paracentral            | 2.10 (0.06)        | 2.11 (0.06) | 2.14 (0.06)               | 2.10 (0.06)                    | 2.16 (0.13)             | 2.11 (0.06) |
| R paracentral            | 2.16 (0.06)        | 2.14 (0.06) | 2.17 (0.06)               | 2.13 (0.06)                    | 2.17 (0.12)             | 2.16 (0.06) |
| L frontal pole           | 2.62 (0.04)        | 2.57 (0.05) | <b>2.58 (0.05)</b>        | <b>2.51 (0.05)<sup>A</sup></b> | 2.18 (0.19)             | 2.51 (0.05) |
| R frontal pole           | 2.51 (0.04)        | 2.53 (0.04) | 2.51 (0.04)               | 2.48 (0.04)                    | 2.23 (0.20)             | 2.48 (0.05) |
| L superior parietal      | 1.99 (0.03)        | 2.00 (0.03) | <b>1.99 (0.03)</b>        | <b>1.93 (0.03)<sup>B</sup></b> | 1.95 (0.11)             | 1.90 (0.03) |
| R superior parietal      | 1.97 (0.03)        | 1.97 (0.03) | <b>1.97 (0.03)</b>        | <b>1.91 (0.03)<sup>B</sup></b> | 1.89 (0.11)             | 1.87 (0.03) |
| L inferior parietal      | 2.22 (0.02)        | 2.19 (0.02) | <b>2.21 (0.02)</b>        | <b>2.12 (0.02)<sup>C</sup></b> | 2.18 (0.11)             | 2.06 (0.03) |

|                                  |                    |                                |                    |                                |                    |                                |
|----------------------------------|--------------------|--------------------------------|--------------------|--------------------------------|--------------------|--------------------------------|
| R inferior parietal              | 2.23 (0.03)        | 2.21 (0.03)                    | <b>2.21 (0.03)</b> | <b>2.13 (0.03)<sup>C</sup></b> | 2.19 (0.11)        | 2.06 (0.03)                    |
| L supramarginal                  | 2.28 (0.02)        | 2.28 (0.03)                    | <b>2.29 (0.03)</b> | <b>2.22 (0.03)<sup>C</sup></b> | 2.31 (0.11)        | 2.16 (0.03)                    |
| R supramarginal                  | 2.31 (0.03)        | 2.28 (0.03)                    | <b>2.30 (0.03)</b> | <b>2.25 (0.03)<sup>B</sup></b> | 2.25 (0.10)        | 2.18 (0.03)                    |
| L postcentral                    | 1.88 (0.03)        | 1.87 (0.03)                    | <b>1.87 (0.03)</b> | <b>1.83 (0.03)<sup>A</sup></b> | 1.83 (0.09)        | 1.83 (0.03)                    |
| R postcentral                    | 1.86 (0.03)        | 1.86 (0.03)                    | 1.85 (0.03)        | 1.83 (0.03)                    | 1.74 (0.09)        | 1.85 (0.03)                    |
| L precuneus                      | 2.16 (0.02)        | 2.14 (0.03)                    | <b>2.15 (0.02)</b> | <b>2.07 (0.02)<sup>C</sup></b> | 2.07 (0.10)        | 2.02 (0.03)                    |
| R precuneus                      | 2.18 (0.02)        | 2.15 (0.03)                    | <b>2.17 (0.02)</b> | <b>2.10 (0.02)<sup>C</sup></b> | 2.15 (0.10)        | 2.03 (0.03)                    |
| L inferior temporal              | 2.65 (0.04)        | 2.61 (0.04)                    | <b>2.60 (0.04)</b> | <b>2.53 (0.04)<sup>B</sup></b> | <b>2.70 (0.13)</b> | <b>2.44 (0.04)<sup>A</sup></b> |
| R inferior temporal              | 2.69 (0.04)        | 2.66 (0.04)                    | <b>2.64 (0.04)</b> | <b>2.58 (0.04)<sup>A</sup></b> | <b>2.76 (0.13)</b> | <b>2.51 (0.04)<sup>A</sup></b> |
| L middle temporal                | <b>2.66 (0.03)</b> | <b>2.60 (0.03)<sup>B</sup></b> | <b>2.64 (0.03)</b> | <b>2.55 (0.03)<sup>C</sup></b> | 2.64 (0.12)        | 2.47 (0.03)                    |
| R middle temporal                | <b>2.73 (0.03)</b> | <b>2.68 (0.03)<sup>A</sup></b> | <b>2.66 (0.03)</b> | <b>2.61 (0.03)<sup>B</sup></b> | 2.71 (0.12)        | 2.51 (0.04)                    |
| L superior temporal              | 2.55 (0.03)        | 2.52 (0.03)                    | <b>2.52 (0.03)</b> | <b>2.46 (0.03)<sup>B</sup></b> | 2.53 (0.12)        | 2.38 (0.03)                    |
| R superior temporal              | 2.58 (0.02)        | 2.55 (0.03)                    | <b>2.55 (0.02)</b> | <b>2.50 (0.02)<sup>B</sup></b> | 2.57 (0.12)        | 2.41 (0.03)                    |
| L banks superior temporal sulcus | 2.27 (0.03)        | 2.25 (0.03)                    | <b>2.29 (0.03)</b> | <b>2.20 (0.03)<sup>C</sup></b> | 2.2 (0.13)         | 2.11 (0.03)                    |
| R banks superior temporal sulcus | 2.39 (0.03)        | 2.36 (0.03)                    | <b>2.39 (0.03)</b> | <b>2.30 (0.03)<sup>C</sup></b> | 2.34 (0.13)        | 2.21 (0.03)                    |
| L fusiform                       | 2.58 (0.03)        | 2.54 (0.03)                    | <b>2.54 (0.03)</b> | <b>2.48 (0.03)<sup>B</sup></b> | 2.59 (0.11)        | 2.40 (0.03)                    |
| R fusiform                       | 2.59 (0.03)        | 2.55 (0.03)                    | <b>2.53 (0.03)</b> | <b>2.47 (0.03)<sup>B</sup></b> | 2.51 (0.12)        | 2.38 (0.03)                    |
| L transverse temporal            | 2.09 (0.04)        | 2.12 (0.04)                    | 2.10 (0.04)        | 2.10 (0.04)                    | 2.11 (0.14)        | 2.08 (0.04)                    |
| R transverse temporal            | 2.16 (0.04)        | 2.20 (0.04)                    | 2.18 (0.04)        | 2.17 (0.04)                    | 1.91 (0.15)        | 2.13 (0.04)                    |
| L entorhinal                     | 3.28 (0.04)        | 3.25 (0.05)                    | <b>3.21 (0.04)</b> | <b>3.07 (0.04)<sup>B</sup></b> | 2.97 (0.28)        | 2.92 (0.05)                    |
| R entorhinal                     | 3.45 (0.05)        | 3.49 (0.06)                    | 3.31 (0.05)        | 3.24 (0.05)                    | 3.29 (0.30)        | 3.02 (0.06)                    |
| L temporal pole                  | 3.47 (0.04)        | 3.47 (0.05)                    | 3.39 (0.04)        | 3.38 (0.04)                    | 3.49 (0.25)        | 3.34 (0.05)                    |
| R temporal pole                  | 3.65 (0.04)        | 3.63 (0.05)                    | 3.48 (0.04)        | 3.51 (0.04)                    | 3.54 (0.25)        | 3.39 (0.05)                    |
| L parahippocampal                | <b>2.60 (0.03)</b> | <b>2.50 (0.04)<sup>A</sup></b> | <b>2.61 (0.04)</b> | <b>2.47 (0.04)<sup>B</sup></b> | <b>2.90 (0.24)</b> | <b>2.34 (0.05)<sup>A</sup></b> |
| R parahippocampal                | 2.59 (0.04)        | 2.53 (0.04)                    | 2.54 (0.04)        | 2.47 (0.04)                    | 2.68 (0.21)        | 2.32 (0.05)                    |
| L lateral occipital              | 2.01 (0.03)        | 2.02 (0.03)                    | <b>2.01 (0.03)</b> | <b>1.97 (0.03)<sup>A</sup></b> | 1.94 (0.10)        | 1.94 (0.03)                    |
| R lateral occipital              | 2.03 (0.03)        | 2.04 (0.03)                    | <b>2.06 (0.03)</b> | <b>2.01 (0.03)<sup>B</sup></b> | 2.01 (0.10)        | 1.96 (0.04)                    |
| L lingual                        | 1.89 (0.02)        | 1.88 (0.02)                    | 1.85 (0.02)        | 1.82 (0.02)                    | 1.82 (0.09)        | 1.83 (0.03)                    |
| R lingual                        | 1.93 (0.02)        | 1.92 (0.02)                    | <b>1.92 (0.02)</b> | <b>1.88 (0.02)<sup>B</sup></b> | 1.77 (0.10)        | 1.86 (0.02)                    |



|                              |             |             |                    |                                |                    |                                |
|------------------------------|-------------|-------------|--------------------|--------------------------------|--------------------|--------------------------------|
| L cuneus                     | 1.69 (0.03) | 1.68 (0.03) | 1.68 (0.03)        | 1.66 (0.03)                    | 1.57 (0.10)        | 1.69 (0.04)                    |
| R cuneus                     | 1.72 (0.03) | 1.73 (0.03) | 1.73 (0.03)        | 1.70 (0.03)                    | 1.69 (0.10)        | 1.72 (0.04)                    |
| L pericalcarine              | 1.48 (0.03) | 1.49 (0.03) | 1.49 (0.03)        | 1.48 (0.03)                    | <b>1.34 (0.10)</b> | <b>1.54 (0.03)<sup>A</sup></b> |
| R pericalcarine              | 1.52 (0.03) | 1.52 (0.03) | <b>1.55 (0.03)</b> | <b>1.52 (0.03)<sup>A</sup></b> | 1.47 (0.10)        | 1.55 (0.03)                    |
| L rostral anterior cingulate | 2.73 (0.03) | 2.73 (0.03) | 2.70 (0.03)        | 2.74 (0.03)                    | 2.75 (0.18)        | 2.73 (0.04)                    |
| R rostral anterior cingulate | 2.71 (0.03) | 2.72 (0.03) | <b>2.67 (0.03)</b> | <b>2.75 (0.03)<sup>B</sup></b> | 2.70 (0.17)        | 2.73 (0.04)                    |
| L caudal anterior cingulate  | 2.58 (0.03) | 2.55 (0.04) | 2.53 (0.03)        | 2.56 (0.03)                    | 2.70 (0.22)        | 2.54 (0.04)                    |
| R caudal anterior cingulate  | 2.44 (0.03) | 2.40 (0.03) | 2.41 (0.03)        | 2.44 (0.03)                    | 2.53 (0.18)        | 2.45 (0.04)                    |
| L posterior cingulate        | 2.38 (0.02) | 2.35 (0.02) | 2.35 (0.02)        | 2.33 (0.02)                    | 2.33 (0.11)        | 2.26 (0.02)                    |
| R posterior cingulate        | 2.31 (0.02) | 2.30 (0.02) | 2.31 (0.02)        | 2.30 (0.02)                    | 2.32 (0.11)        | 2.24 (0.02)                    |
| L isthmus cingulate          | 2.33 (0.02) | 2.31 (0.03) | 2.25 (0.03)        | 2.21 (0.03)                    | 2.21 (0.14)        | 2.13 (0.03)                    |
| R isthmus cingulate          | 2.24 (0.02) | 2.23 (0.03) | 2.20 (0.02)        | 2.16 (0.02)                    | 2.33 (0.14)        | 2.09 (0.03)                    |
| L insula                     | 2.90 (0.02) | 2.91 (0.03) | 2.89 (0.02)        | 2.90 (0.02)                    | 2.79 (0.13)        | 2.85 (0.03)                    |
| R insula                     | 2.89 (0.02) | 2.87 (0.02) | 2.86 (0.02)        | 2.85 (0.02)                    | 2.72 (0.12)        | 2.81 (0.02)                    |

Data are presented as estimate (standard error). Estimates were derived from linear mixed models including diagnosis x amyloid and age, gender and *APOE*  $\epsilon$ 4 genotype as covariates and cohort as random effect. *APOE*: apolipoprotein E; L: left; R: right.

<sup>A</sup> p < 0.05, <sup>B</sup> p < 0.01, <sup>C</sup> p < 0.001 compared to amyloid negative within diagnostic group.

**Table S7: Surface area measures according to diagnosis and amyloid status**

| Diagnosis                | Cognitively Normal |                              | Mild Cognitive Impairment |                               | Alzheimer type dementia |                               |
|--------------------------|--------------------|------------------------------|---------------------------|-------------------------------|-------------------------|-------------------------------|
| Amyloid status           | Negative           | Positive                     | Negative                  | Positive                      | Negative                | Positive                      |
| L superior frontal       | 7147 (124)         | 7094 (135)                   | 7124 (127)                | 7032 (128)                    | <b>7991 (516)</b>       | <b>6914 (140)<sup>A</sup></b> |
| R superior frontal       | 7010 (124)         | 6943 (135)                   | <b>6988 (127)</b>         | <b>6805 (128)<sup>A</sup></b> | 7676 (523)              | 6752 (141)                    |
| L rostral middle frontal | 5723 (129)         | 5661 (138)                   | <b>5701 (131)</b>         | <b>5496 (132)<sup>A</sup></b> | 5805 (487)              | 5419 (143)                    |
| R rostral middle frontal | 5909 (137)         | 5822 (146)                   | 5857 (139)                | 5727 (140)                    | 6501 (502)              | 5574 (150)                    |
| L caudal middle frontal  | 2304 (53)          | 2227 (59)                    | 2316 (54)                 | 2255 (55)                     | 2356 (252)              | 2204 (62)                     |
| R caudal middle frontal  | 2132 (53)          | 2051 (59)                    | 2138 (54)                 | 2072 (55)                     | 2267 (236)              | 2033 (61)                     |
| L pars opercularis       | 1619 (38)          | 1610 (43)                    | 1650 (39)                 | 1608 (40)                     | 1690 (186)              | 1584 (45)                     |
| R pars opercularis       | 1380 (28)          | 1392 (33)                    | <b>1418 (30)</b>          | <b>1363 (30)<sup>A</sup></b>  | 1476 (151)              | 1320 (35)                     |
| L pars orbitalis         | 623 (11)           | 622 (12)                     | 623 (11)                  | 606 (12)                      | 634 (53)                | 581 (13)                      |
| R pars orbitalis         | 769 (13)           | 766 (15)                     | 768 (13)                  | 752 (13)                      | 835 (66)                | 721 (15)                      |
| L pars triangularis      | 1260 (26)          | 1253 (29)                    | 1275 (27)                 | 1240 (27)                     | 1440 (124)              | 1211 (30)                     |
| R pars triangularis      | 1440 (28)          | 1464 (33)                    | 1459 (30)                 | 1434 (30)                     | 1518 (152)              | 1400 (35)                     |
| L lateral orbitofrontal  | 2550 (44)          | 2539 (49)                    | <b>2585 (45)</b>          | <b>2505 (46)<sup>A</sup></b>  | 2774 (203)              | 2426 (51)                     |
| R lateral orbitofrontal  | 2500 (58)          | 2456 (61)                    | 2494 (59)                 | 2470 (59)                     | <b>2782 (200)</b>       | <b>2379 (63)<sup>A</sup></b>  |
| L medial orbitofrontal   | 1840 (40)          | 1825 (43)                    | 1832 (41)                 | 1814 (41)                     | 2104 (166)              | 1793 (45)                     |
| R medial orbitofrontal   | 1827 (29)          | 1798 (32)                    | 1819 (30)                 | 1782 (30)                     | <b>2055 (140)</b>       | <b>1770 (34)<sup>A</sup></b>  |
| L precentral             | 4997 (101)         | 4961 (107)                   | 5061 (102)                | 4985 (103)                    | 5274 (356)              | 4976 (110)                    |
| R precentral             | 5045 (105)         | 5014 (110)                   | 5039 (106)                | 5018 (107)                    | <b>5963 (352)</b>       | <b>5058 (113)<sup>B</sup></b> |
| L paracentral            | 1369 (28)          | 1390 (31)                    | 1388 (29)                 | 1385 (29)                     | 1512 (133)              | 1348 (33)                     |
| R paracentral            | <b>1555 (32)</b>   | <b>1618 (36)<sup>A</sup></b> | 1571 (33)                 | 1587 (33)                     | 1653 (150)              | 1561 (37)                     |
| L frontal pole           | 208 (5)            | 205 (5)                      | 201 (5)                   | 198 (5)                       | 182 (23)                | 201 (5)                       |
| R frontal pole           | <b>284 (6)</b>     | <b>270 (6)<sup>B</sup></b>   | 273 (6)                   | 269 (6)                       | <b>345 (29)</b>         | <b>275 (7)<sup>A</sup></b>    |
| L superior parietal      | 5379 (108)         | 5294 (117)                   | 5343 (110)                | 5355 (111)                    | 5789 (423)              | 5253 (121)                    |
| R superior parietal      | 5442 (105)         | 5359 (113)                   | 5396 (107)                | 5312 (108)                    | 6010 (410)              | 5230 (117)                    |
| L inferior parietal      | 4683 (92)          | 4606 (100)                   | 4721 (94)                 | 4586 (95)                     | <b>5107 (395)</b>       | <b>4307 (105)<sup>A</sup></b> |

|                                  |                  |                              |                   |                               |                   |                               |
|----------------------------------|------------------|------------------------------|-------------------|-------------------------------|-------------------|-------------------------------|
| R inferior parietal              | 5659 (106)       | 5571 (117)                   | <b>5565 (109)</b> | <b>5375 (110)<sup>A</sup></b> | <b>6237 (463)</b> | <b>5199 (122)<sup>A</sup></b> |
| L supramarginal                  | 3966 (73)        | 3891 (82)                    | 3909 (76)         | 3867 (77)                     | 3751 (345)        | 3792 (86)                     |
| R supramarginal                  | 3676 (65)        | 3690 (74)                    | 3748 (68)         | 3671 (68)                     | 3245 (327)        | 3537 (78)                     |
| L postcentral                    | 4313 (73)        | 4252 (80)                    | 4280 (74)         | 4315 (75)                     | 4455 (315)        | 4308 (83)                     |
| R postcentral                    | 4132 (68)        | 4112 (75)                    | 4147 (70)         | 4172 (71)                     | 4162 (304)        | 4096 (79)                     |
| L precuneus                      | 3786 (63)        | 3737 (70)                    | 3790 (65)         | 3758 (65)                     | 3907 (285)        | 3610 (73)                     |
| R precuneus                      | 3948 (56)        | 3913 (65)                    | 3973 (59)         | 3928 (60)                     | 3869 (307)        | 3728 (69)                     |
| L inferior temporal              | <b>3332 (81)</b> | <b>3191 (87)<sup>A</sup></b> | 3269 (82)         | 3196 (83)                     | <b>4070 (316)</b> | <b>3007 (90)<sup>B</sup></b>  |
| R inferior temporal              | <b>3138 (66)</b> | <b>2971 (72)<sup>B</sup></b> | 3123 (67)         | 3059 (68)                     | <b>3499 (296)</b> | <b>2841 (76)<sup>A</sup></b>  |
| L middle temporal                | <b>3073 (57)</b> | <b>2954 (63)<sup>A</sup></b> | <b>3022 (58)</b>  | <b>2931 (59)<sup>A</sup></b>  | 3222 (257)        | 2823 (65)                     |
| R middle temporal                | <b>3399 (58)</b> | <b>3244 (64)<sup>B</sup></b> | <b>3356 (59)</b>  | <b>3218 (60)<sup>B</sup></b>  | 3523 (261)        | 3085 (67)                     |
| L superior temporal              | 3773 (64)        | 3741 (70)                    | <b>3779 (65)</b>  | <b>3645 (66)<sup>B</sup></b>  | 3778 (271)        | 3618 (73)                     |
| R superior temporal              | 3575 (63)        | 3535 (68)                    | <b>3589 (64)</b>  | <b>3487 (65)<sup>A</sup></b>  | 3837 (251)        | 3394 (70)                     |
| L banks superior temporal sulcus | 1048 (21)        | 1047 (25)                    | <b>1049 (22)</b>  | <b>999 (23)<sup>A</sup></b>   | 986 (113)         | 987 (26)                      |
| R banks superior temporal sulcus | 974 (17)         | 949 (20)                     | <b>965 (18)</b>   | <b>923 (18)<sup>B</sup></b>   | 929 (92)          | 867 (21)                      |
| L fusiform                       | 3243 (62)        | 3162 (68)                    | 3172 (64)         | 3122 (64)                     | 2879 (265)        | 3092 (71)                     |
| R fusiform                       | 3159 (49)        | 3099 (56)                    | <b>3101 (51)</b>  | <b>3006 (52)<sup>A</sup></b>  | 2945 (252)        | 2909 (59)                     |
| L transverse temporal            | <b>469 (11)</b>  | <b>451 (12)<sup>A</sup></b>  | <b>464 (11)</b>   | <b>443 (11)<sup>A</sup></b>   | 447 (49)          | 440 (13)                      |
| R transverse temporal            | 338 (8)          | 347 (9)                      | 351 (8)           | 342 (8)                       | <b>417 (36)</b>   | <b>329 (9)<sup>A</sup></b>    |
| L entorhinal                     | 411 (14)         | 399 (15)                     | 413 (14)          | 399 (14)                      | 329 (51)          | 373 (15)                      |
| R entorhinal                     | <b>369 (11)</b>  | <b>341 (12)<sup>B</sup></b>  | <b>361 (11)</b>   | <b>340 (12)<sup>A</sup></b>   | 381 (52)          | 347 (13)                      |
| L temporal pole                  | 472 (9)          | 465 (10)                     | 464 (9)           | 461 (9)                       | 447 (42)          | 437 (10)                      |
| R temporal pole                  | 416 (7)          | 407 (9)                      | 418 (8)           | 414 (8)                       | 405 (42)          | 411 (9)                       |
| L parahippocampal                | 701 (10)         | 708 (13)                     | 676 (11)          | 674 (11)                      | 551 (67)          | 666 (14)                      |
| R parahippocampal                | 683 (9)          | 681 (12)                     | 664 (10)          | 651 (10)                      | <b>791 (63)</b>   | <b>648 (13)<sup>A</sup></b>   |
| L lateral occipital              | 4754 (83)        | 4735 (92)                    | <b>4874 (86)</b>  | <b>4660 (87)<sup>B</sup></b>  | 5142 (371)        | 4643 (96)                     |
| R lateral occipital              | 4505 (85)        | 4466 (93)                    | 4647 (87)         | 4535 (88)                     | <b>5603 (356)</b> | <b>4471 (96)<sup>B</sup></b>  |
| L lingual                        | 3050 (45)        | 2970 (53)                    | 3009 (48)         | 2938 (48)                     | 2735 (251)        | 2877 (56)                     |
| R lingual                        | 3050 (37)        | 2993 (47)                    | <b>3059 (41)</b>  | <b>2949 (42)<sup>A</sup></b>  | 3365 (247)        | 2941 (50)                     |

|                              |           |           |                  |                              |                   |                              |
|------------------------------|-----------|-----------|------------------|------------------------------|-------------------|------------------------------|
| L cuneus                     | 1419 (24) | 1409 (28) | 1445 (25)        | 1418 (26)                    | 1562 (129)        | 1369 (30)                    |
| R cuneus                     | 1495 (26) | 1465 (29) | 1495 (27)        | 1484 (27)                    | 1666 (133)        | 1431 (31)                    |
| L pericalcarine              | 1330 (29) | 1322 (33) | 1353 (30)        | 1339 (30)                    | 1533 (154)        | 1318 (35)                    |
| R pericalcarine              | 1504 (27) | 1494 (32) | 1519 (29)        | 1486 (29)                    | 1731 (163)        | 1477 (35)                    |
| L rostral anterior cingulate | 864 (20)  | 837 (23)  | 874 (20)         | 860 (21)                     | 979 (105)         | 814 (24)                     |
| R rostral anterior cingulate | 700 (17)  | 678 (20)  | 697 (18)         | 693 (18)                     | 672 (95)          | 669 (21)                     |
| L caudal anterior cingulate  | 667 (15)  | 643 (18)  | 671 (16)         | 655 (16)                     | 543 (92)          | 638 (19)                     |
| R caudal anterior cingulate  | 776 (15)  | 757 (19)  | 785 (16)         | 781 (16)                     | 837 (99)          | 756 (20)                     |
| L posterior cingulate        | 1161 (20) | 1129 (23) | 1168 (21)        | 1129 (21)                    | 1063 (113)        | 1125 (25)                    |
| R posterior cingulate        | 1196 (18) | 1195 (22) | <b>1216 (20)</b> | <b>1169 (20)<sup>A</sup></b> | 1185 (114)        | 1142 (24)                    |
| L isthmus cingulate          | 1053 (18) | 1055 (22) | 1062 (20)        | 1040 (20)                    | 1302 (113)        | 1083 (24)                    |
| R isthmus cingulate          | 981 (19)  | 984 (22)  | 1002 (20)        | 977 (20)                     | 1088 (102)        | 975 (23)                     |
| L insula                     | 2203 (37) | 2198 (40) | 2206 (38)        | 2193 (38)                    | <b>2487 (148)</b> | <b>2163 (42)<sup>B</sup></b> |
| R insula                     | 2264 (47) | 2256 (50) | 2283 (47)        | 2260 (48)                    | <b>2719 (170)</b> | <b>2227 (51)<sup>A</sup></b> |

Data are presented as estimate (standard error). Estimates were derived from linear mixed models including diagnosis x amyloid and age, gender and *APOE*- $\epsilon$ 4 as covariates and cohort as random effect. *APOE*: apolipoprotein E; L: left; R: right.

<sup>A</sup> p < 0.05, <sup>B</sup> p < 0.01, <sup>C</sup> p < 0.001 compared to amyloid negative within diagnostic group.

**Table S8: Features considered and selected for classifier**

|                               | Cognitively normal | Mild Cognitive Impairment | Whole sample |                                | Cognitively normal | Mild Cognitive Impairment | Whole sample |
|-------------------------------|--------------------|---------------------------|--------------|--------------------------------|--------------------|---------------------------|--------------|
| Feature                       | Feature importance |                           |              | Feature                        | Feature importance |                           |              |
| <b>Demographic</b>            |                    |                           |              | <b>Genetic</b>                 |                    |                           |              |
| - Age                         | 17 (0.009)         | 18 (0.020)                | 27 (0.015)   | - <i>APOE</i> ε4 carrier       | 1 (0.071)          | 1 (0.121)                 | 1 (0.135)    |
| - Sex                         |                    |                           |              |                                |                    |                           |              |
| - Education                   |                    |                           |              | <b>MRI subcortical volumes</b> |                    |                           |              |
| <b>Neuropsychology</b>        |                    |                           |              | - L hippocampus                | 12 (0.011)         | 6 (0.036)                 | 11 (0.034)   |
| - MMSE                        |                    | 7 (0.033)                 | 10 (0.034)   | - R hippocampus                | 8 (0.018)          | 2 (0.059)                 | 3 (0.051)    |
| - CDR Total                   |                    |                           |              | - L amygdala                   | 5 (0.023)          |                           | 15 (0.028)   |
| - Memory immediate            | 4 (0.023)          |                           | 31 (0.015)   | - R amygdala                   | 7 (0.019)          | 15 (0.020)                | 9 (0.035)    |
| - Memory delayed              |                    | 37 (0.009)                |              | - L thalamus                   |                    | 33 (0.009)                |              |
| - Language                    | 9 (0.015)          |                           |              | - R thalamus                   |                    |                           |              |
| - Attention                   |                    |                           |              | - L caudate                    |                    |                           |              |
| - Executive functioning       | 33 (0.007)         |                           |              | - R caudate                    | 28 (0.007)         | 29 (0.009)                | 30 (0.015)   |
| - Visuoconstruction           | 37 (0.006)         |                           |              | - L putamen                    | 10 (0.015)         |                           | 24 (0.015)   |
| <b>MRI Visual rating</b>      |                    |                           |              | - R putamen                    | 11 (0.012)         |                           |              |
| - MTA                         |                    |                           | 2 (0.051)    | - L pallidum                   | 14 (0.010)         |                           |              |
| - MTA abnormal                |                    |                           | 8 (0.035)    | - R pallidum                   |                    |                           |              |
| - GCA                         |                    | 26 (0.009)                | 13 (0.031)   | - L accumbens                  | 2 (0.036)          |                           | 25 (0.015)   |
| - Parietal                    |                    |                           | 12 (0.032)   | - R accumbens                  | 3 (0.031)          |                           | 23 (0.016)   |
| - Fazekas                     | 44 (0.005)         |                           |              | <b>MRI other</b>               |                    |                           |              |
| - Lacunes                     | 27 (0.007)         |                           |              | - AD signature ROI             | 25 (0.007)         | 10 (0.028)                | 32 (0.008)   |
| <b>MRI cortical thickness</b> |                    |                           |              | <b>MRI surface area</b>        |                    |                           |              |
| - L superior frontal          |                    |                           |              | - L superior frontal           |                    |                           |              |
| - R superior frontal          |                    | 20 (0.015)                | 19 (0.016)   | - R superior frontal           |                    |                           |              |
| - L rostral middle frontal    |                    | 11 (0.026)                |              | - L rostral middle frontal     |                    |                           |              |
| - R rostral middle frontal    |                    | 9 (0.029)                 |              | - R rostral middle frontal     |                    |                           |              |
| - L caudal middle frontal     |                    | 38 (0.009)                |              | - L caudal middle frontal      |                    |                           |              |
| - R caudal middle frontal     |                    |                           |              | - R caudal middle frontal      |                    |                           |              |

|                             |            |            |            |                             |            |            |            |
|-----------------------------|------------|------------|------------|-----------------------------|------------|------------|------------|
| - L pars opercularis        |            | 13 (0.021) |            | - L pars opercularis        | 39 (0.006) |            |            |
| - R pars opercularis        |            | 28 (0.012) |            | - R pars opercularis        |            |            |            |
| - L pars orbitalis          |            |            |            | - L pars orbitalis          |            |            |            |
| - R pars orbitalis          |            |            |            | - R pars orbitalis          |            |            |            |
| - L pars triangularis       |            | 24 (0.015) |            | - L pars triangularis       |            |            |            |
| - R pars triangularis       | 23 (0.008) |            |            | - R pars triangularis       |            |            |            |
| - L lateral orbitofrontal   |            |            |            | - L lateral orbitofrontal   |            |            |            |
| - R lateral orbitofrontal   | 46 (0.005) |            |            | - R lateral orbitofrontal   |            |            |            |
| - L medial orbitofrontal    |            | 36 (0.009) |            | - L medial orbitofrontal    |            |            |            |
| - R medial orbitofrontal    |            | 19 (0.015) |            | - R medial orbitofrontal    | 30 (0.007) |            |            |
| - L precentral              |            |            |            | - L precentral              | 20 (0.009) |            |            |
| - R precentral              |            |            |            | - R precentral              |            |            |            |
| - L paracentral             |            | 17 (0.020) |            | - L paracentral             | 13 (0.011) |            | 28 (0.015) |
| - R paracentral             |            |            |            | - R paracentral             | 6 (0.020)  |            |            |
| - L frontal pole            |            |            |            | - L frontal pole            |            | 32 (0.009) |            |
| - R frontal pole            |            |            |            | - R frontal pole            | 41 (0.006) |            |            |
| - L superior parietal       |            |            |            | - L superior parietal       |            |            |            |
| - R superior parietal       |            |            |            | - R superior parietal       | 24 (0.007) |            |            |
| - L inferior parietal       |            | 14 (0.020) |            | - L inferior parietal       |            |            |            |
| - R inferior parietal       |            |            | 17 (0.016) | - R inferior parietal       |            |            | 35 (0.007) |
| - L supramarginal           |            |            |            | - L supramarginal           |            |            |            |
| - R supramarginal           |            | 31 (0.009) |            | - R supramarginal           |            |            |            |
| - L postcentral             |            |            |            | - L postcentral             |            |            |            |
| - R postcentral             |            |            |            | - R postcentral             |            |            |            |
| - L precuneus               |            | 23 (0.015) | 33 (0.008) | - L precuneus               |            |            |            |
| - R precuneus               |            |            |            | - R precuneus               |            |            |            |
| - L inferior temporal       |            |            |            | - L inferior temporal       |            |            |            |
| - R inferior temporal       | 45 (0.005) |            |            | - R inferior temporal       | 26 (0.007) |            |            |
| - L middle temporal         | 16 (0.009) |            | 22 (0.016) | - L middle temporal         |            |            |            |
| - R middle temporal         |            | 16 (0.020) |            | - R middle temporal         | 36 (0.007) |            | 6 (0.044)  |
| - L superior temporal       | 32 (0.007) | 12 (0.024) | 21 (0.016) | - L superior temporal       |            |            |            |
| - R superior temporal       | 35 (0.007) | 30 (0.009) | 16 (0.016) | - R superior temporal       |            |            |            |
| - L banks superior temporal |            | 3 (0.052)  | 14 (0.028) | - L banks superior temporal |            |            |            |
| - R banks superior temporal |            |            |            | - R banks superior temporal | 47 (0.005) |            |            |

|                                |            |            |            |                                |            |            |  |
|--------------------------------|------------|------------|------------|--------------------------------|------------|------------|--|
| - L fusiform                   |            |            | 20 (0.016) | - L fusiform                   |            |            |  |
| - R fusiform                   |            | 25 (0.015) |            | - R fusiform                   |            |            |  |
| - L transverse temporal        |            |            |            | - L transverse temporal        | 42 (0.006) |            |  |
| - R transverse temporal        |            |            |            | - R transverse temporal        |            |            |  |
| - L entorhinal                 |            | 5 (0.043)  | 26 (0.015) | - L entorhinal                 |            |            |  |
| - R entorhinal                 |            |            | 4 (0.045)  | - R entorhinal                 | 18 (0.009) |            |  |
| - L temporal pole              |            |            |            | - L temporal pole              |            |            |  |
| - R temporal pole              |            |            |            | - R temporal pole              |            |            |  |
| - L parahippocampal            | 15 (0.002) | 8 (0.032)  | 7 (0.044)  | - L parahippocampal            |            |            |  |
| - R parahippocampal            | 21 (0.008) | 21 (0.015) |            | - R parahippocampal            |            |            |  |
| - L lateral occipital          |            |            |            | - L lateral occipital          |            |            |  |
| - R lateral occipital          |            |            |            | - R lateral occipital          |            |            |  |
| - L lingual                    |            | 34 (0.009) |            | - L lingual                    |            |            |  |
| - R lingual                    |            |            |            | - R lingual                    |            |            |  |
| - L cuneus                     |            |            |            | - L cuneus                     |            |            |  |
| - R cuneus                     |            |            |            | - R cuneus                     |            |            |  |
| - L pericalcarine              | 29 (0.007) |            |            | - L pericalcarine              |            |            |  |
| - R pericalcarine              | 31 (0.007) | 27 (0.012) |            | - R pericalcarine              |            |            |  |
| - L rostral anterior cingulate |            |            |            | - L rostral anterior cingulate |            |            |  |
| - R rostral anterior cingulate |            |            |            | - R rostral anterior cingulate |            |            |  |
| - L caudal anterior cingulate  |            |            |            | - L caudal anterior cingulate  | 43 (0.005) |            |  |
| - R caudal anterior cingulate  | 34 (0.007) |            |            | - R caudal anterior cingulate  |            |            |  |
| - L posterior cingulate        | 38 (0.006) |            |            | - L posterior cingulate        | 40 (0.006) | 35 (0.009) |  |
| - R posterior cingulate        |            |            |            | - R posterior cingulate        |            |            |  |
| - L isthmus cingulate          |            | 4 (0.045)  | 5 (0.044)  | - L isthmus cingulate          |            |            |  |
| - R isthmus cingulate          |            |            |            | - R isthmus cingulate          |            |            |  |
| - L insula                     |            | 22 (0.015) | 34 (0.007) | - L insula                     | 19 (0.009) |            |  |
| - R insula                     |            |            | 18 (0.016) | - R insula                     | 22 (0.008) |            |  |

In the table are presented the features considered for the machine-learning, organized by type of measurement. The numbers represent for each sample (CN, MCI, whole sample) the features selected ranked by most important. Averaged feature weights are reported in brackets. Those features without a number were not selected.
